# Supplementary material for: Influence of Fruit Maturity at Harvest on the Intensity of Smoke Taint in Wine
Source: PubMed Central journal article supplement (PMC6272140; doi:10.3390/molecules20058913), 2015-05-18
Supplement: molecules-20-08913-s001.pdf [file molecules-20-08913-s001.pdf]

# Supplementary

**Table S1.** Mean ratings for sensory attributes of control and smoke-affected Chardonnay, Sauvignon Blanc, Merlot and Shiraz wines.

|                  | Chardonnay        |                   |                   |                   |          | Sauvignon Blanc   |                   |                  |                   |          | Merlot            |                   |                   |                  |          | Shiraz           |                   |                   |                   |          |
|------------------|-------------------|-------------------|-------------------|-------------------|----------|-------------------|-------------------|------------------|-------------------|----------|-------------------|-------------------|-------------------|------------------|----------|------------------|-------------------|-------------------|-------------------|----------|
|                  | Harvest A         |                   | Harvest B         |                   | <i>P</i> | Harvest A         |                   | Harvest B        |                   | <i>P</i> | Harvest A         |                   | Harvest B         |                  | <i>P</i> | Harvest A        |                   | Harvest B         |                   | <i>P</i> |
|                  | C                 | S                 | C                 | S                 |          | C                 | S                 | C                | S                 |          | C                 | S                 | C                 | S                |          | C                | S                 |                   |                   |          |
| <i>Aroma</i>     |                   |                   |                   |                   |          |                   |                   |                  |                   |          |                   |                   |                   |                  |          |                  |                   |                   |                   |          |
| Fruit            | 4.0 <sup>ab</sup> | 3.9 <sup>ab</sup> | 4.5 <sup>a</sup>  | 3.3 <sup>b</sup>  | 0.05     | 3.7 <sup>b</sup>  | 3.5 <sup>b</sup>  | 5.2 <sup>a</sup> | 4.6 <sup>a</sup>  | 0.001    | 4.7 <sup>a</sup>  | 3.3 <sup>b</sup>  | 4.5 <sup>a</sup>  | 3.6 <sup>b</sup> | 0.001    | 4.1              | 3.7               | 4.2               | 3.8               | ns       |
| Smoke            | 1.4 <sup>b</sup>  | 2.3 <sup>b</sup>  | 1.7 <sup>b</sup>  | 4.4 <sup>a</sup>  | 0.001    | 1.5 <sup>c</sup>  | 4.0 <sup>a</sup>  | 2.3 <sup>b</sup> | 2.7 <sup>b</sup>  | 0.001    | 1.9 <sup>c</sup>  | 6.9 <sup>a</sup>  | 1.9 <sup>c</sup>  | 4.6 <sup>b</sup> | 0.001    | 1.5 <sup>c</sup> | 4.0 <sup>a</sup>  | 2.7 <sup>b</sup>  | 4.7 <sup>a</sup>  | 0.001    |
| Cold ash         | 0.8 <sup>b</sup>  | 1.1 <sup>b</sup>  | 0.8 <sup>b</sup>  | 2.9 <sup>a</sup>  | 0.001    | 0.9 <sup>b</sup>  | 2.4 <sup>a</sup>  | 0.9 <sup>b</sup> | 1.6 <sup>b</sup>  | 0.0001   | 1.3 <sup>b</sup>  | 4.4 <sup>a</sup>  | 1.0 <sup>b</sup>  | 3.5 <sup>a</sup> | 0.001    | 1.0 <sup>b</sup> | 2.5 <sup>a</sup>  | 1.9 <sup>a</sup>  | 2.6 <sup>a</sup>  | 0.001    |
| Earthy           | 2.4               | 2.6               | 2.0               | 3.0               | ns       | 2.8               | 2.6               | 1.8              | 2.5               | ns       | 2.7               | 2.0               | 2.2               | 2.3              | ns       | 2.7              | 2.3               | 2.8               | 3.1               | ns       |
| Medicinal        | 0.8               | 0.9               | 0.6               | 1.1               | ns       | 0.7               | 1.2               | 0.8              | 1.2               | ns       | 1.5               | 2.5               | 1.3               | 1.5              | ns       | 1.1              | 1.6               | 1.4               | 1.6               | ns       |
| <i>Palate</i>    |                   |                   |                   |                   |          |                   |                   |                  |                   |          |                   |                   |                   |                  |          |                  |                   |                   |                   |          |
| Fruit            | 3.7               | 3.9               | 3.9               | 3.6               | ns       | 3.1 <sup>bc</sup> | 3.0 <sup>c</sup>  | 4.5 <sup>a</sup> | 4.1 <sup>ab</sup> | 0.05     | 3.3 <sup>bc</sup> | 2.8 <sup>c</sup>  | 4.6 <sup>a</sup>  | 3.7 <sup>b</sup> | 0.001    | 2.5 <sup>c</sup> | 3.6 <sup>b</sup>  | 3.7 <sup>b</sup>  | 4.6 <sup>a</sup>  | 0.001    |
| Smoky            | 1.3 <sup>b</sup>  | 2.4 <sup>b</sup>  | 1.9 <sup>b</sup>  | 4.5 <sup>a</sup>  | 0.001    | 1.3 <sup>c</sup>  | 3.6 <sup>a</sup>  | 1.9 <sup>c</sup> | 2.7 <sup>b</sup>  | 0.001    | 1.6 <sup>b</sup>  | 5.5 <sup>a</sup>  | 2.1 <sup>b</sup>  | 4.5 <sup>a</sup> | 0.001    | 1.9 <sup>c</sup> | 3.4 <sup>b</sup>  | 2.9 <sup>b</sup>  | 4.6 <sup>a</sup>  | 0.001    |
| Ashy aftertaste  | 1.2 <sup>b</sup>  | 1.7 <sup>b</sup>  | 1.6 <sup>b</sup>  | 4.0 <sup>b</sup>  | 0.001    | 0.8 <sup>c</sup>  | 3.5 <sup>a</sup>  | 1.5 <sup>c</sup> | 2.5 <sup>b</sup>  | 0.001    | 1.6 <sup>b</sup>  | 5.5 <sup>a</sup>  | 2.3 <sup>b</sup>  | 4.6 <sup>a</sup> | 0.001    | 1.6 <sup>c</sup> | 2.6 <sup>b</sup>  | 2.6 <sup>b</sup>  | 3.8 <sup>a</sup>  | 0.001    |
| Woody aftertaste | 1.0 <sup>b</sup>  | 1.1 <sup>b</sup>  | 1.3 <sup>ab</sup> | 1.8 <sup>a</sup>  | 0.05     | 0.5 <sup>b</sup>  | 1.3 <sup>a</sup>  | 1.4 <sup>a</sup> | 1.5 <sup>a</sup>  | 0.01     | 1.2 <sup>c</sup>  | 2.0 <sup>ab</sup> | 1.6 <sup>bc</sup> | 2.4 <sup>a</sup> | 0.01     | 1.3 <sup>b</sup> | 1.8 <sup>a</sup>  | 1.7 <sup>ab</sup> | 2.0 <sup>a</sup>  | 0.05     |
| Medicinal        | 0.7 <sup>b</sup>  | 0.9 <sup>b</sup>  | 0.9 <sup>b</sup>  | 1.5 <sup>a</sup>  | 0.01     | 0.8               | 1.4               | 1.0              | 1.2               | ns       | 0.8 <sup>b</sup>  | 1.8 <sup>a</sup>  | 0.9 <sup>b</sup>  | 1.8 <sup>a</sup> | 0.05     | 1.3              | 1.7               | 1.2               | 1.8               | ns       |
| Metallic         | 1.9               | 1.8               | 1.5               | 1.7               | ns       | 2.1               | 1.9               | 1.4              | 1.3               | ns       | 1.6               | 2.0               | 1.9               | 2.0              | ns       | 1.9 <sup>b</sup> | 2.5 <sup>ab</sup> | 2.6 <sup>a</sup>  | 2.8 <sup>a</sup>  | 0.05     |
| Bitter           | 4.1 <sup>b</sup>  | 4.8 <sup>a</sup>  | 4.1 <sup>b</sup>  | 4.5 <sup>ab</sup> | 0.05     | 1.7 <sup>b</sup>  | 1.9 <sup>b</sup>  | 3.6 <sup>a</sup> | 3.9 <sup>a</sup>  | 0.001    | 2.2               | 2.6               | 3.2               | 3.5              | ns       | 3.0 <sup>b</sup> | 4.1 <sup>a</sup>  | 4.4 <sup>a</sup>  | 4.7 <sup>a</sup>  | 0.001    |
| Drying           | 4.1 <sup>b</sup>  | 4.8 <sup>a</sup>  | 4.1 <sup>b</sup>  | 4.5 <sup>ab</sup> | 0.01     | 4.7               | 4.7               | 4.5              | 4.5               | ns       | 5.0 <sup>b</sup>  | 5.4 <sup>b</sup>  | 5.6 <sup>ab</sup> | 6.1 <sup>a</sup> | 0.01     | 5.2 <sup>c</sup> | 6.3 <sup>b</sup>  | 7.0 <sup>ab</sup> | 7.2 <sup>a</sup>  | 0.001    |
| Acidity          | 7.6 <sup>b</sup>  | 8.5 <sup>a</sup>  | 6.7 <sup>c</sup>  | 7.6 <sup>b</sup>  | 0.001    | 11.6 <sup>a</sup> | 10.9 <sup>a</sup> | 7.0 <sup>b</sup> | 7.1 <sup>b</sup>  | 0.001    | 7.9               | 7.5               | 7.3               | 7.5              | ns       | 6.8 <sup>b</sup> | 7.2 <sup>ab</sup> | 8.0 <sup>a</sup>  | 7.6 <sup>ab</sup> | 0.05     |

Values represent the mean score from three wine replicates presented to 13 judges in three replicated sensory sessions. Values followed by different letters are significantly different (compared within each variety); ns, not significant; C = control; S = smoke-affected.
